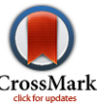

# Growth and Nitrogen Uptake Characteristics Reveal Outbreak Mechanism of the Opportunistic Macroalga *Gracilaria tenuistipitata*

Chao Wang<sup>1,2</sup>, Anping Lei<sup>1\*</sup>, Kai Zhou<sup>3\*</sup>, Zhengyu Hu<sup>2</sup>, Wenlong Hao<sup>1</sup>, Junda Yang<sup>1</sup>

**1** College of Life Sciences, Shenzhen University, Shenzhen, China, **2** Institute of Hydrobiology, Chinese Academy of Sciences, Wuhan, China, **3** Shenzhen Marine Environment and Resources Monitoring Center, Shenzhen, China

## Abstract

Macroalgae has bloomed in the brackish lake of Shenzhen Bay, China continuously from 2010 to 2014. *Gracilaria tenuistipitata* was identified as the causative macroalgal species. The aim of this study was to explore the outbreak mechanism of *G. tenuistipitata*, by studying the effects of salinity and nitrogen sources on growth, and the different nitrogen sources uptake characteristic. Our experimental design was based on environmental conditions observed in the bloom areas, and these main factors were simulated in the laboratory. Results showed that salinity 12 to 20 ‰ was suitable for *G. tenuistipitata* growth. When the nitrogen sources' ( $\text{NH}_4^+$ ,  $\text{NO}_3^-$ ) concentrations reached 40  $\mu\text{M}$  or above, the growth rate of *G. tenuistipitata* was significantly higher. Algal biomass was higher (approximately 1.4 times) when cultured with  $\text{NH}_4^+$  than that with  $\text{NO}_3^-$  addition. Coincidentally, macroalgal bloom formed during times of moderate salinity ( $\sim 12$  ‰) and high nitrogen conditions. The  $\text{NH}_4^+$  and  $\text{NO}_3^-$  uptake characteristic was studied to understand the potential mechanism of *G. tenuistipitata* bloom.  $\text{NH}_4^+$  uptake was best described by a linear, rate-unsaturated response, with the slope decreasing with time intervals. In contrast,  $\text{NO}_3^-$  uptake followed a rate-saturating mechanism best described by the Michaelis-Menten model, with kinetic parameters  $V_{max} = 37.2 \mu\text{M g}^{-1} \text{DM h}^{-1}$  and  $K_s = 61.5 \mu\text{M}$ . Further, based on the isotope  $^{15}\text{N}$  tracer method, we found that  $^{15}\text{N}$  from  $\text{NH}_4^+$  accumulated faster and reached an atom% twice than that of  $^{15}\text{N}$  from  $\text{NO}_3^-$ , suggesting when both  $\text{NH}_4^+$  and  $\text{NO}_3^-$  were available,  $\text{NH}_4^+$  was assimilated more rapidly. The results of the present study indicate that in the estuarine environment, the combination of moderate salinity with high ammonium may stimulate bloom formation.

**Citation:** Wang C, Lei A, Zhou K, Hu Z, Hao W, et al. (2014) Growth and Nitrogen Uptake Characteristics Reveal Outbreak Mechanism of the Opportunistic Macroalga *Gracilaria tenuistipitata*. PLoS ONE 9(10): e108980. doi:10.1371/journal.pone.0108980

**Editor:** Anna R. Armitage, Texas A&M University at Galveston, United States of America

**Received:** April 30, 2014; **Accepted:** August 13, 2014; **Published:** October 9, 2014

**Copyright:** © 2014 Wang et al. This is an open-access article distributed under the terms of the Creative Commons Attribution License, which permits unrestricted use, distribution, and reproduction in any medium, provided the original author and source are credited.

**Data Availability:** The authors confirm that all data underlying the findings are fully available without restriction. Data have been deposited to Dryad and are available at: 10.5061/dryad.c3575.

**Funding:** This work was supported by National Natural Science Foundation of China (31170491), Shenzhen Municipal Basic research program (JCYJ20130329114940668) and a project from Shenzhen Marine Environment and Resources Monitoring Center(HHZZB11025). The funders had no role in study design, data collection and analysis, decision to publish, or preparation of the manuscript.

**Competing Interests:** The authors have declared that no competing interests exist.

\* Email: aplei@szu.edu.cn (AL); kzhou@tom.com (KZ)

## Introduction

Macroalgal blooms have a broad range of ecological impacts and are considered to be harmful algal blooms [1]. Many studies have addressed the potential ecological and environmental consequences of macroalgal blooms [2,3], including uncoupled biogeochemical cycles, degraded intertidal environment, reduced biodiversity, hypoxia or anoxia, destruction of coastal marine habitats (e.g., seagrass) and economic losses of marine industries (e.g., fisheries and tourism) [4,5,6,7,8,9].

In January 2013, red algae bloomed in the OCT North Lake of Shenzhen. Initially, a bloom of macroalgae occurred near the shore (Fig. 1A), then the lake surface became full of floating red macroalgae (Fig. 1B). Just 1 month later, from the surface to the bottom of the lake were filled with this kind of fast growing macroalgae and decomposition happened afterwards (Fig. 1C and D), becoming a serious issue for the local administration. The over-grown red algae were identified as Rhodophyta, Gigartinales, Gracilariaceae, *Gracilaria*, *Gracilaria tenuistipitata* (Fig. 1E and

F). The damage caused by the bloom of *G. tenuistipitata* during this period included tourism and cleanup costs (about \$ 50,000) (according to the local management office). Besides this, along with macroalgae decomposition, dead fish were also observed, indicating the lake ecological system has been damaged, to some extent.

Several hypotheses were proposed to explain the occurrence of macroalgal blooms in estuarine areas [10,11,12]. The OCT North Lake is connected to Shenzhen Bay which encountered strong anthropogenic influence, there are  $\sim 0.2$  million tons/day land-based fresh wastewater input [13], resulting in Shenzhen Bay as perennial brackish water (salinity 8–20‰) with high nitrogen loadings (essentially  $\text{NH}_4^+$ ) leading to eutrophication [14]. Considering the estuarine environment, the effect of salinity on growth of *G. tenuistipitata* was investigated in this study. The ability to uptake and assimilate nutrients rapidly is one of the characteristics of opportunistic species. Concerning mechanisms of algal blooms, the bioavailability of nitrogen is the most important among all of the biogenic elements [2,3]. In coastal areas, nitrogen is available to macroalgae majorly in the forms Dissolved

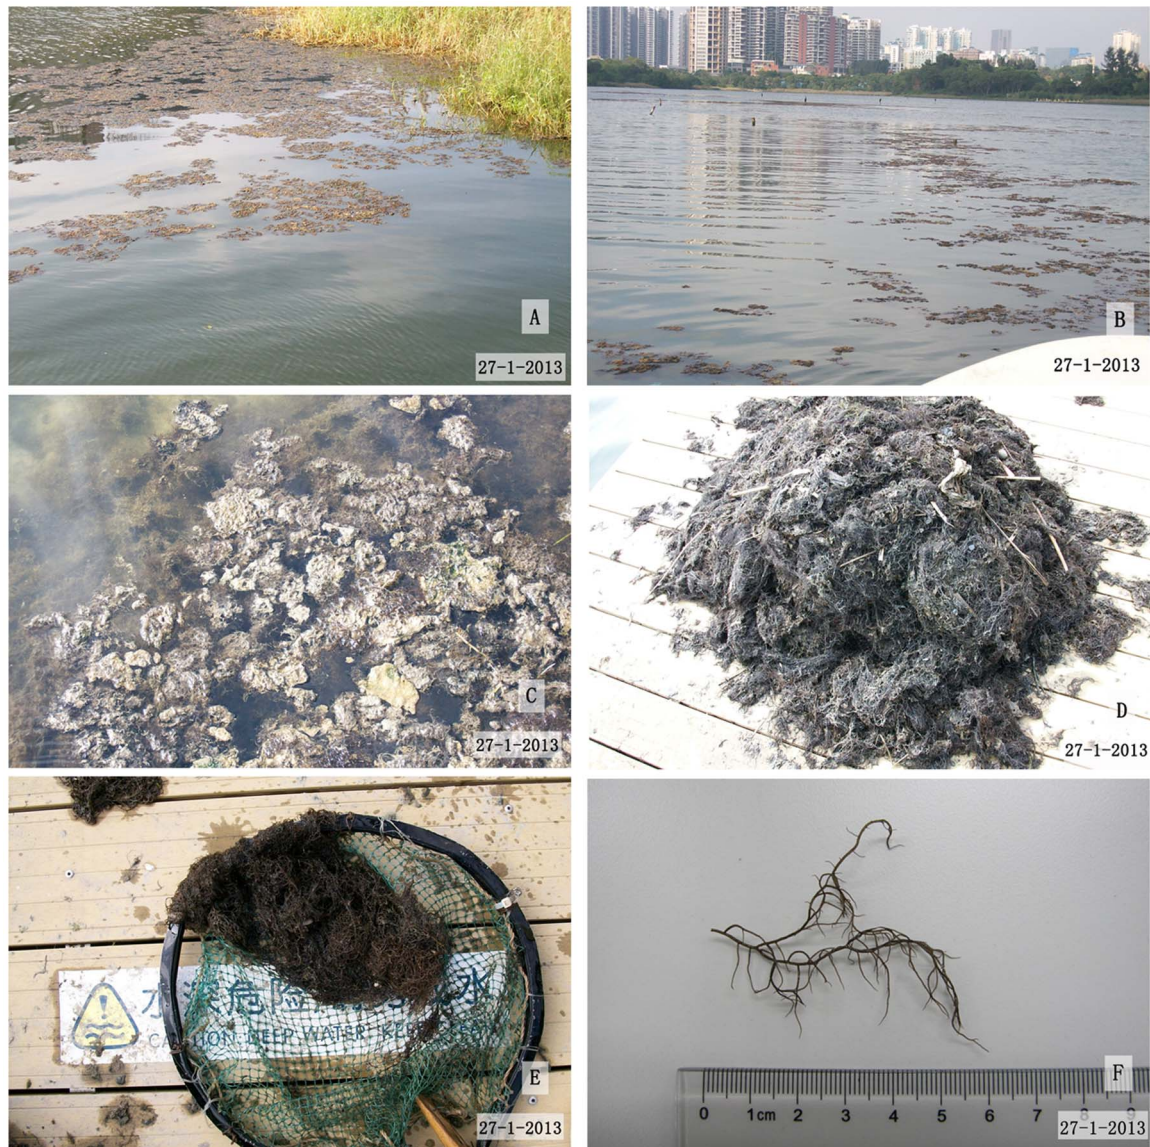

**Figure 1. The *G. tenuistipitata* in OCT North Lake.** A,B,C) The *G. tenuistipitata* bloom in OCT North Lake, D) The salvaged *G. tenuistipitata*, E) Samples of *G. tenuistipitata* collected, F) Observation and identification of macroalgae.  
doi:10.1371/journal.pone.0108980.g001

Inorganic Nitrogen (DIN): ammonium ( $\text{NH}_4^+$ ) and nitrate ( $\text{NO}_3^-$ ). It is well known that fast growing species are positively affected by increased nutrient availability [15], thus, the effects of  $\text{NH}_4^+$  and  $\text{NO}_3^-$  on macroalgal growth were also investigated in this study.

A profound knowledge of the nitrogen uptake kinetics of *G. tenuistipitata* is important essentially for two reasons: It helps to study the algal potential assimilation efficiency and it is fundamental to assess its potential as a biofilter in estuaries and coastal waters [16,17,18]. There is a set of works studying the uptake kinetics in Marine macroalgae Chlorophyta and Rhodophyta species [19,20,21,22]. The Michaelis-Menten equation was generally used to describe nutrient uptake by phytoplankton over the past few years [23], while the results varied depending on algal species and nutrients. Some macroalgae followed Michaelis-Menten kinetics, some did not, and some species did not show a clear way of assimilating  $\text{NH}_4^+$  or  $\text{NO}_3^-$  [22]. Our work intended to provide more information regarding the nitrogen uptake

dynamics of brackish water grown Rhodophyta species *G. tenuistipitata* in an attempt to elucidate the mechanism behind bloom formation. Short-term kinetics of  $\text{NH}_4^+$  and  $\text{NO}_3^-$  uptake were studied for the uptake characteristic of *G. tenuistipitata*. Nitrogen uptake has been studied for a variety of macroalgae, but the N species preference is still discussed [24,25]. Elucidating the uptake strategy of *G. tenuistipitata* is essential because this red alga is the major bloom-forming species in nutrient-rich estuaries [26,27]. One mechanism that may enhance bloom ability is the capability to choose and use different DIN species at the same time [19]. This isotope  $^{15}\text{N}$  tracer study was used to quantify uptake and assimilation strategy of  $\text{NH}_4^+$  and  $\text{NO}_3^-$  offered simultaneously in order to assess potential mechanisms that may enhance the bloom ability of *G. tenuistipitata* during irregular pulses of nitrogen sources.

## Materials and Methods

### Ethics Statement

Permission to investigation, public photos and sampling inside the OCT North Lake was approved through permits from the Overseas Chinese Town Holdings Company (OCT Group) and the Shenzhen government. Our field investigation did not involve endangered or protected species.

### Algal material

During the macroalgal bloom, thalli of *G. tenuistipitata* were sampled from OCT North Lake (22°31'46.06"N, 113°58'40.32"E), Shenzhen, in January 2013. Healthy algal thalli collected were transported to the lab in a cool box within 4 h. Then they were flushed several times with artificial seawater to remove epiphytes, slime, sediment and small grazers, and then cultured in nutrient-deplete sterile artificial seawater [28] with vitamins and trace elements added according to the f/2 medium at salinity 12±1‰. Each algal sample was cultured for 3–5 days with bubbling air before the experiment. The cultures were kept at the salinity 12±1‰, temperature 25±0.5°C, with irradiance of 56 μE m<sup>-2</sup> S<sup>-1</sup> and photoperiod of 12:12 (Light: Dark).

### Salinity effects on growth rates

To determine the variable salinity effects on growth of *G. tenuistipitata*, we evaluated the Relative Growth Rates (RGR) of *G. tenuistipitata* at salinities of 4, 8, 12, 16, 20, 24, 28 and 32 ‰ over a 15-day period. Approximately 0.1 g wet weight of *G. tenuistipitata* was added to 600 mL sterile f/2 enriched artificial seawater in a 1-L glass beaker at conditions described above. Each algal sample was assigned at random. The enriched medium was renewed every four days. Four replicates were used for each treatment. Every 4 days, the *G. tenuistipitata* thalli were blotted dry and the fresh weight determined, and RGR were calculated:  $RGR = (\ln w_2 - \ln w_1) / \Delta t$ , where  $w_1$  is the initial fresh mass and  $w_2$  is the fresh mass after  $\Delta t$  days.

### Nitrogen source effects on growth rates

The effects of nitrogen source on growth rates of *G. tenuistipitata* were tested for 15 days. For the nitrogen-effect experiment, two nitrogen sources, ammonium (NH<sub>4</sub>Cl) and nitrate (NaNO<sub>3</sub>) were applied. Nitrogen (NH<sub>4</sub><sup>+</sup> or NO<sub>3</sub><sup>-</sup>) concentrations were adjusted to 5, 10, 20, 40, 60, 80, 100 μM, treatments without nitrogen addition were taken as control groups. 30 μM phosphate (KH<sub>2</sub>PO<sub>4</sub>) was added to all treatments to avoid P limitation [29]. The fresh algal thalli of 0.1 g was randomly put in a 1-L glass beaker filled with 600 mL nutrient-deplete sterile artificial seawater at conditions described above. All glass material used during the experiment had been acid washed with 10% HCL to prevent possible nutrient contamination. Nutrient-enriched media were renewed every four days. Four replicates were used for each treatment.

### Nitrogen source uptake

The nitrogen (NO<sub>3</sub><sup>-</sup> and NH<sub>4</sub><sup>+</sup>) uptake of *G. tenuistipitata* was determined by monitoring the nutrient depletion of the medium. The nutrient-deplete experimental artificial seawater was obtained from *G. tenuistipitata* culture medium mentioned above. After cultured alga for 5 days then NH<sub>4</sub><sup>+</sup> and NO<sub>3</sub><sup>-</sup> concentrations were monitored daily until their concentrations were below the detection limit (0.05 μM N L<sup>-1</sup>), then culture media were filtered (GF/C) used as nutrient-depleted seawater medium. The uptake experiment was performed in 400 mL medium with nutrients added from stock solutions in 500-mL sterilized glass beakers.

Uptake experiments with NO<sub>3</sub><sup>-</sup> or NH<sub>4</sub><sup>+</sup> were started with 10, 20, 40, 60, 80, 100 μM respectively. To avoid P shortage, 30 μM PO<sub>4</sub><sup>3-</sup> (KH<sub>2</sub>PO<sub>4</sub>) was added in the experiments. In order to determine the initial N concentrations, 2 ml seawater samples were taken before adding the macroalga. Further 2 ml seawater samples were collected at each time interval: 10, 20, 30 and 60 min. Seawater samples from both experiments were filtered (GF/C) and kept at -20°C until analysis (within 1 week). Analysis of NH<sub>4</sub><sup>+</sup> and NO<sub>3</sub><sup>-</sup> was carried out using a CleverChem 200 automated discrete analyzer (DeChem-Tech. GmbH, Germany) according to the manufacturer's instructions. Algal material was dried to a constant weight (48 h) in an oven kept at 60°C for dry weight. Uptake rates ( $V$ ) were calculated from changes in substrate concentrations during each sampling interval using the equation:  $V = [(C_0 \times V_0) - (C_t \times V_t)] / (t \times DM)$ , where  $C_0$  and  $C_t$  are the substrate nutrient concentration, and  $V_0$  and  $V_t$  are the volumes before and after a sampling period ( $t$ ), and DM is algal dry biomass.

For estimation of the kinetic parameters of each N source, uptake rates were plotted together in  $V$  vs  $S$  curves. The  $V$  (uptake rate) against  $V/S$  ( $S = \text{NH}_4^+$  or  $\text{NO}_3^-$  concentration) linear transformation of the Michaelis-Menten equation was used to determine whether the data could be described by Michaelis-Menten kinetics [30]. Data which showed saturation kinetics were fitted to the Michaelis-Menten equation:  $V = (V_{max} \times C) / (K_s + C)$ , using enzyme kinetics module (non-linear regression model) to analyze each replicate dataset according to the instructions of SigmaPlot 12.5 (SPSS Inc., Chicago, USA). The Michaelis-Menten equation and parameters,  $V_{max}$  (maximum uptake rate) and  $K_s$  (substrate concentration at which uptake proceeds at half the maximum rate) were obtained from the analysis.

### Nitrogen preferences

After nitrogen starvation of 4–5 days, nitrogen uptake was estimated using stable isotopes as tracers. Uptake experiments were initiated by adding tracer amounts (50 μM N with 10 atom % <sup>15</sup>N) of highly enriched (96–99%) <sup>15</sup>N-labeled NO<sub>3</sub><sup>-</sup> or NH<sub>4</sub><sup>+</sup> to nutrient-deplete artificial seawater mentioned above placed in 30 ml acid-washed glass tubes. NO<sub>3</sub><sup>-</sup> or NH<sub>4</sub><sup>+</sup> were added in different ratios, with only one DIN species labeled with <sup>15</sup>N per trial. After 1 h or 24 h, the algal thalli were briefly rinsed with deionized water, and dried at 60°C to constant weight (48 h), powdered with a Spex mixer (Spex CertiPrep, Inc., Edison, NJ), and analyzed for TN and <sup>15</sup>N enrichment with an isotope ratio mass spectrometer (Europa Scientific Integra). Water samples were filtered (GF/C) and immediately analyzed for ammonium, nitrite, and nitrate. <sup>15</sup>N enrichment was calculated based on the methods of Naldi and Wheeler [25].

### Data analysis

Separate one-way ANOVA were used to analyze the responses of *G. tenuistipitata* to the different salinity treatments or nutrient (NO<sub>3</sub><sup>-</sup> and NH<sub>4</sub><sup>+</sup>) sources in terms of RGR. Data were initially examined for homogeneity of variance and  $F$ -tests were performed to test the significance of difference among treatments. Tukey test (equal variances) was then used to test the significance of difference between two specific treatments, if significant difference was found among treatments. Statistical analyses were performed with SPSS 18.0 (SPSS Inc., Chicago, USA).

## Results

### Effects of salinity and nitrogen sources on growth rate

After the 15-day culture, there were significant differences in the RGR associated with salinity (One-way ANOVA,  $P < 0.01$ ). RGR of *G. tenuistipitata* was relatively high with salinity ranging from 12 to 20 ‰, and the highest RGR was 4.2%/d at salinity 20 ‰. Biomasses significantly decreased when cultured in low (4 ‰) (Tukey's test,  $P < 0.05$ ) or high (>20‰) salinity seawater (Tukey's test,  $P < 0.05$ ) (Fig. 2A).

There were significant differences between RGR of *G. tenuistipitata* associated with nitrogen addition ( $\text{NH}_4^+$  or  $\text{NO}_3^-$ ) after 15 days (One-way ANOVA,  $P < 0.01$ ). RGR was enhanced with increasing nitrogen ( $\text{NH}_4^+$  or  $\text{NO}_3^-$ ) concentrations, when the nitrogen ( $\text{NH}_4^+$ ,  $\text{NO}_3^-$ ) was up to 40  $\mu\text{M}$ , however, there was no significant difference in RGR with higher concentrations (40–100  $\mu\text{M}$ ) ( $P > 0.05$ , Fig. 2B and C), with the highest RGR observed in treatments of 100  $\mu\text{M}$  nitrogen ( $\text{NH}_4^+$  or  $\text{NO}_3^-$ ). Interestingly, the algal biomass was higher (approximately 1.5 times) in algae cultured with  $\text{NH}_4^+$  addition than that with  $\text{NO}_3^-$  addition, respectively (Fig. 2B and C).

### Nitrogen ( $\text{NH}_4^+$ or $\text{NO}_3^-$ ) uptake

During the 1 h experiment, uptake rates ( $V_{0-1\text{h}}$ ) of *G. tenuistipitata* increased with  $\text{NH}_4^+$  concentration levels. Uptake efficiency decreased, as suggested by a gradual decline in the uptake rates of  $\text{NH}_4^+$  over sequential time intervals. The  $V$ - $S$  of  $\text{NH}_4^+$  was linearly positive correlated, best described by rate-unsaturated model (Fig. 3A, B, C and D). The bloom-forming red alga showed the highest uptake rates about 32  $\mu\text{M g}^{-1}\text{DM h}^{-1}$  for the first 10 min at the concentration of 100  $\mu\text{M}$ .

High  $\text{NO}_3^-$  uptake rates ( $V$ ) of *G. tenuistipitata* were obtained from 0 to 10 min. Uptake rates for the  $\text{NO}_3^-$  decreased over the time intervals. With increasing concentrations of  $\text{NO}_3^-$ , the uptake rates showed a tendency to saturation (Fig. 4A, B, C and D), and the  $V$ - $S$  of  $\text{NO}_3^-$  was fitted to Michaelis-Menten model. Kinetic parameters ( $V_{max}$  and  $K_s$ ) following the Michaelis-Menten equation for  $\text{NO}_3^-$  uptake by *G. tenuistipitata* at different time intervals during the 1 h experiment were shown in Table 1. The highest  $V_{max}$  and  $K_s$  values in the experiment with  $\text{NO}_3^-$  were 37.2  $\mu\text{M g}^{-1}\text{DM h}^{-1}$  and 61.5  $\mu\text{M}$ .

### Nitrogen uptake preferences

The accumulation of  $^{15}\text{N}$  in *G. tenuistipitata* was rapid in 1 h, but decreased over time (Fig. 5A and B).  $^{15}\text{N}$  accumulation from sole source N cultures of  $\text{NH}_4^+$  increased faster and during 24 h time interval reached an enrichment twice that for  $^{15}\text{N}$  of  $\text{NO}_3^-$  (51.52 vs. 26.32 N enrichment, Fig. 5B).  $^{15}\text{NH}_4^+$  accumulation by *G. tenuistipitata* exceeded  $^{15}\text{NO}_3^-$  enrichment in all the two sources N cultures, regardless of the ratio of  $\text{NH}_4^+$  versus  $\text{NO}_3^-$  supplied and time. When the  $\text{NH}_4^+$  supply was lower than that of  $\text{NO}_3^-$  (20%:80%, 40%:60%), more  $^{15}\text{NH}_4^+$  was accumulated. These results revealed that when  $\text{NH}_4^+$  and  $\text{NO}_3^-$  were supplied simultaneously, *G. tenuistipitata* preferentially assimilate  $\text{NH}_4^+$ .

## Discussion

Salinity in the estuarine or coastal areas is a reflection of the balance of land source flows and seawater from tidal flux. High tide and water exchange have changed the balance of freshwater and seawater and caused a change of salinity within the OCT North Lake. Salinity is an important influence on the growth, photosynthesis, and respiration of *Gracilaria* spp. [31,32]. Bunsom found that salinity was the most crucial factor affecting *G.*

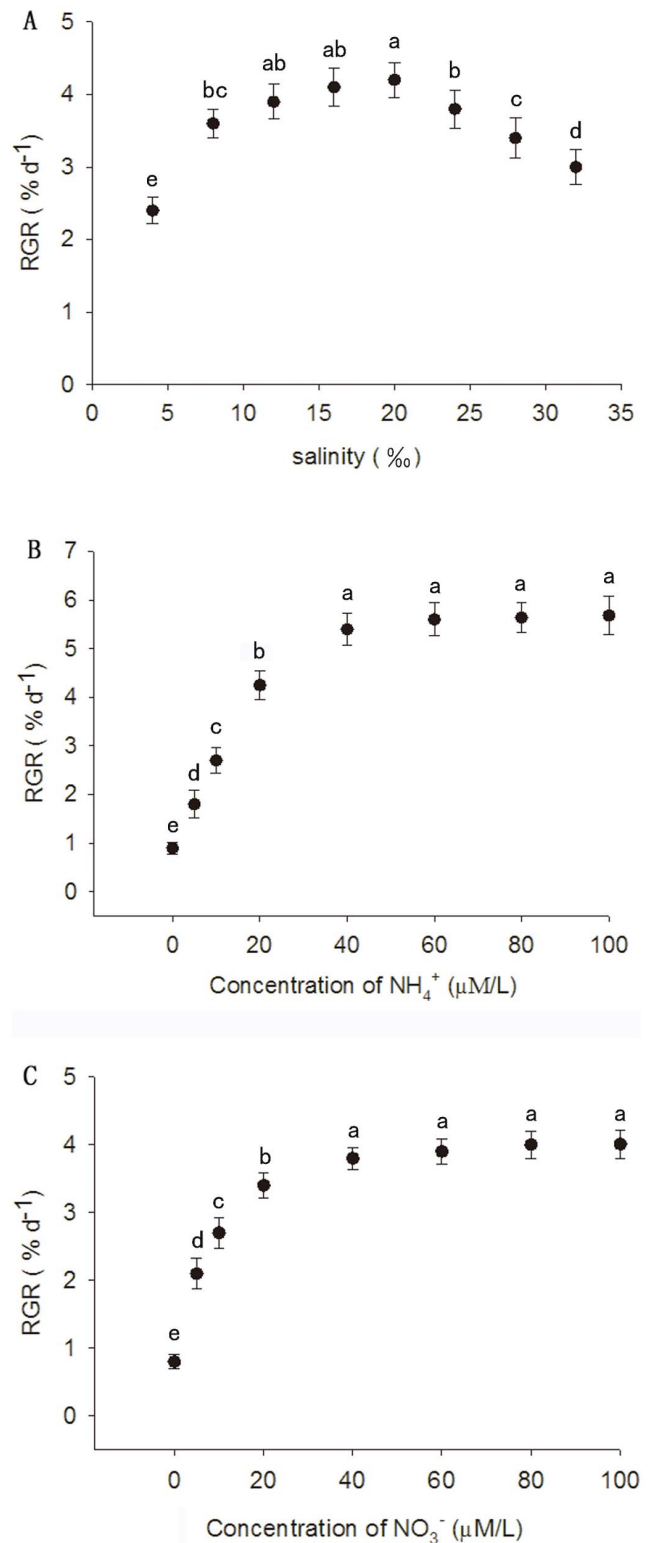

**Figure 2. Effects of A) salinity, B) ammonium ( $\text{NH}_4^+$ ) and C) nitrate ( $\text{NO}_3^-$ ) on relative growth rate (RGR) of *G. tenuistipitata* after the 15-day culture.** A) f/2 medium was enriched, B and C) Phosphate was enriched in all treatments (30  $\mu\text{M}$ ). Means and SD are shown (n=4).

doi:10.1371/journal.pone.0108980.g002

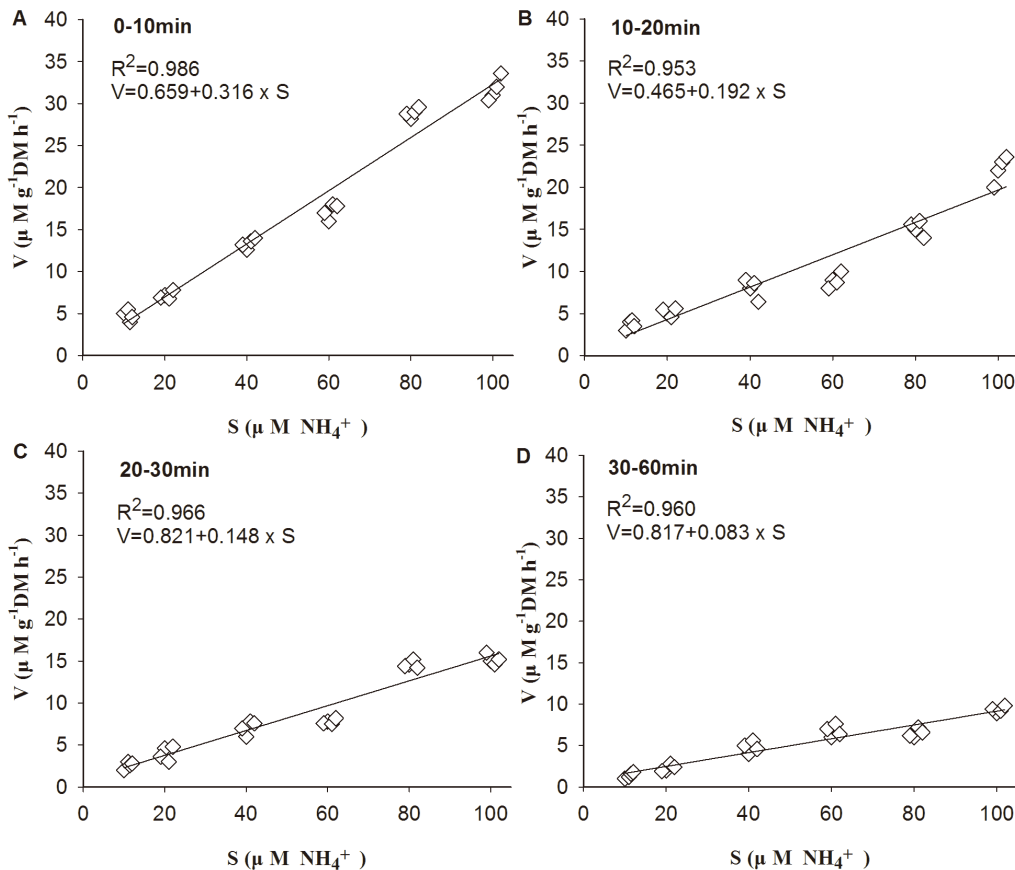

**Figure 3. Ammonium ( $\text{NH}_4^+$ ) uptake rates by *G. tenuistipitata* at different time intervals and different substrate concentration.** Phosphate ( $30 \mu\text{M}$ ) was added in all treatments. doi:10.1371/journal.pone.0108980.g003

*tenuistipitata* growth and the highest growth rate was at 25‰ [33], and it can tolerate salinities as higher as 39‰ [31]. In this study, the highest growth rate of *G. tenuistipitata* was at 20‰, instead of 25‰, perhaps due to perennial exposure to brackish water. Generally, lower salinities often inhibit growth of seaweeds, affect branching patterns and promote changes in their chemical composition [34,35]. Our results showed the lowest growth rate was at 4‰, which was consistent with the result of low salinity growth inhibition. This study revealed that *G. tenuistipitata* from Lake Shenzhen grew well across a wide range of salinities (4–32‰). At the bloom period in January 2013, the salinity was 12.6‰, which was in the favorable range of this macroalga. Adaptability for low salinity might be one of the mechanisms of macroalgal bloom.

Nitrogen is one of the most important limiting factors for phytoplankton growth in aquatic systems [15,36].  $\text{NH}_4^+$  and  $\text{NO}_3^-$  are the principal forms of DIN in estuarine environments where nutrient supply is variable and unpredictable [37,38].  $\text{NH}_4^+$  is primarily supplied to estuaries by sewage spills and treated wastewater [39];  $\text{NO}_3^-$  is the predominant source in riverine [40] and groundwater inputs [41]. The algae of the genus *Gracilaria* are characterized by a simple thallus with a high surface area to volume ratio, allowing for a rapid and efficient response to nutrient input, resulting in high rates of nutrient uptake and growth [15,42]. Our studies reported the maximum average RGR of *G. tenuistipitata* was 5.68%/d at  $100 \mu\text{M NH}_4^+$  and 4.01%/d at  $100 \mu\text{M NO}_3^-$ , compared with an RGR in control groups of less than 0.9%/d. The growth of *G. tenuistipitata* became faster

with increased DIN ( $\text{NH}_4^+$  or  $\text{NO}_3^-$ ) concentration. Nutrient enrichment, due to high N inputs via anthropogenic injection and regenerative processes, has contributed to enhanced growth of opportunistic macroalgae [2]. During the bloom period, in the OCT North Lake, nitrogen in shallow waters is often in the form of  $\text{NH}_4^+$  with average concentration of  $60 \mu\text{M}$ , and  $\text{NO}_3^-$  of  $35 \mu\text{M}$ , P ( $\text{PO}_4^{3-}$ ) of  $5 \mu\text{M}$ . DIN concentration was in the range of significantly positive stimulating this alga growth, while P could not meet this algal need according to the Redfield N (16): P (1) ratio, indicating that P was limiting during the bloom.

Opportunistic macroalgae, often have higher nitrogen uptake rates than other more specialized algae [43]. A high uptake rate allows these opportunistic macroalgae to use nutrients efficiently [44]. With respect to uptake rate, some species followed the classic Michaelis-Menten kinetics for N uptake [22,23], while others have exhibited sustained linear, rate-unsaturated uptake mainly due to eutrophic/oligotrophic level [45,46,22,48,49]. Normally,  $\text{NO}_3^-$  uptake shows saturation kinetics [47]. Smit [48] investigated nitrogen uptake by *Gracilaria gracilis* and concluded that  $\text{NO}_3^-$  uptake followed a rate-saturating mechanism was best described by the Michaelis-Menten model. A set of studies have used extraordinarily high  $\text{NH}_4^+$  concentration ( $500 \mu\text{M}$  above levels) as Table 2 shows, which is toxic to many marine organisms [50], but the results were still positively accorded with Michaelis-Menten or linear models. The max DIN concentration ( $100 \mu\text{M}$ ) in this study was based on the in situ environmental concentrations, and the principal finding about this long-term brackish water lived macroalga for the first time that the  $\text{NH}_4^+$  uptake of *G.*

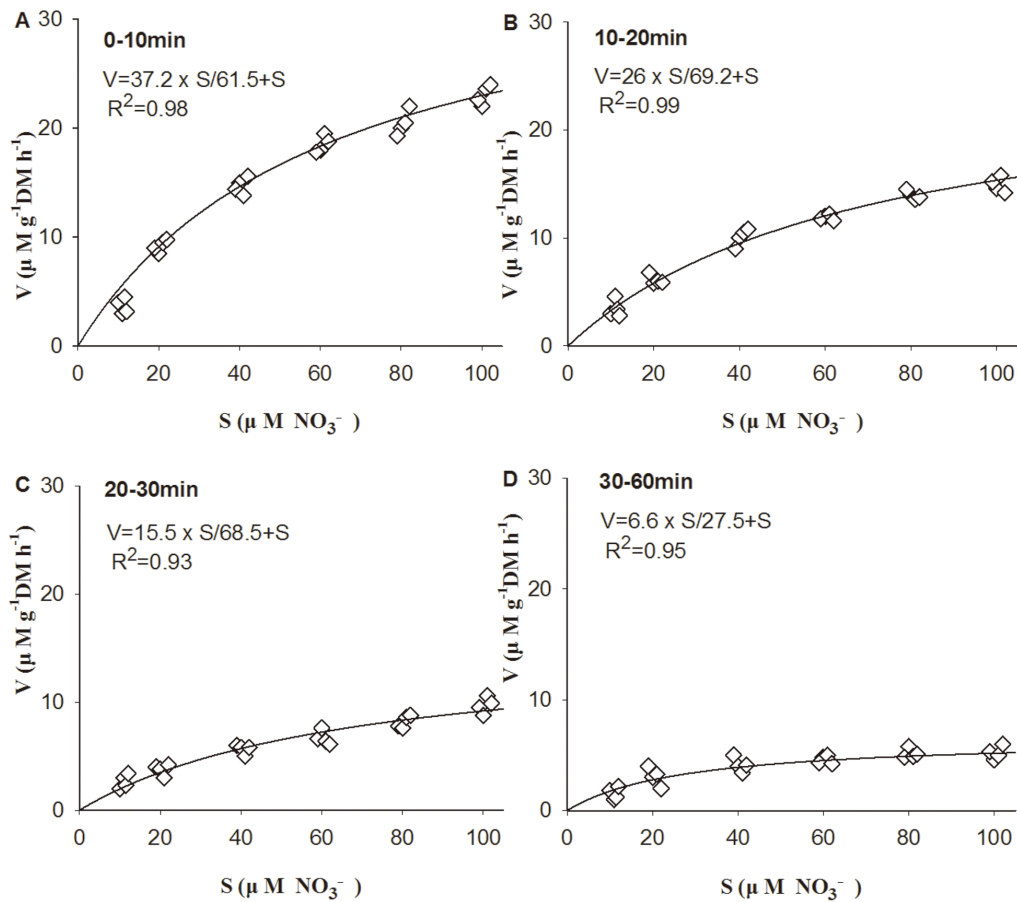

**Figure 4. Nitrate ( $\text{NO}_3^-$ ) uptake rates by *G. tenuistipitata* at different time intervals and different substrate concentration.** Phosphate (30  $\mu\text{M}$ ) was added in all treatments.  
doi:10.1371/journal.pone.0108980.g004

*tenuistipitata* was linear, while the uptake kinetics of  $\text{NO}_3^-$  were distinctly different from those of  $\text{NH}_4^+$ . The uptake rate of  $\text{NO}_3^-$  over time fitted Michaelis-Menten kinetics. This indicated high uptake rate and affinity capability for  $\text{NH}_4^+$ . During the bloom,  $\text{NH}_4^+$  was abundant in OCT North Lake, which might be another reason for macroalgal bloom.

Generally, nitrogen uptake in macroalgae depends on intracellular levels [15] and environmental nitrogen concentrations [51]. Biological factors such as metabolism, morphology, tissue type, the age of the algae, and nutritional history [42,52,53], all influence nitrogen uptake by macroalgae. The DIN uptake pattern can be explained by different nitrogen assimilation mechanisms. The process of nitrogen uptake and assimilation in macroalgae involves transport from the water across the cell membrane and then

assimilation into organic compounds, followed by incorporation into proteins and macromolecules for growth [40]. For  $\text{NO}_3^-$ , there is the additional step of reduction to  $\text{NH}_4^+$  by nitrate reductase after uptake [54]. One explanation for  $\text{NH}_4^+$  affinity may be that energy required for nitrate reduction could be saved [53].

Two parameters of Michaelis-Menten kinetics, namely  $V_{max}$  and  $K_s$ , contain ecologically relevant information relating to the nutrient uptake ability of a species under conditions of varying nutrient availability. In this study, the  $V_{max}$  was 37.2 and  $K_s$  was 61.5 for uptake of  $\text{NO}_3^-$  by *G. tenuistipitata* in Table 1. While, the  $V_{max}$  declined over time intervals, indicating initially very high uptake rates and lower sustained uptake rates. Previous work addressed the uptake differences between Chlorophyta and

**Table 1. Kinetic parameters ( $V_{max}$  and  $K_s$ ) of the Michaels-Menten equation obtained from the rates for uptake of Nitrate ( $\text{NO}_3^-$ ) by *G. tenuistipitata* at different time intervals.**

|                             | Time interval (min) | $V_{max}$ (SE)( $\mu\text{M g}^{-1} \text{DM h}^{-1}$ ) | $K_s$ (SE)( $\mu\text{M}$ ) | $R^2$ |
|-----------------------------|---------------------|---------------------------------------------------------|-----------------------------|-------|
| Nitrate ( $\text{NO}_3^-$ ) | 0–10                | 37.2 (1.85)                                             | 61.5 (6.26)                 | 0.98  |
|                             | 10–20               | 26 (0.97)                                               | 69.2 (5.02)                 | 0.99  |
|                             | 20–30               | 15.5 (0.2)                                              | 68.5 (1.85)                 | 0.93  |
|                             | 30–60               | 6.6 (0.25)                                              | 27.5 (3.07)                 | 0.95  |

doi:10.1371/journal.pone.0108980.t001

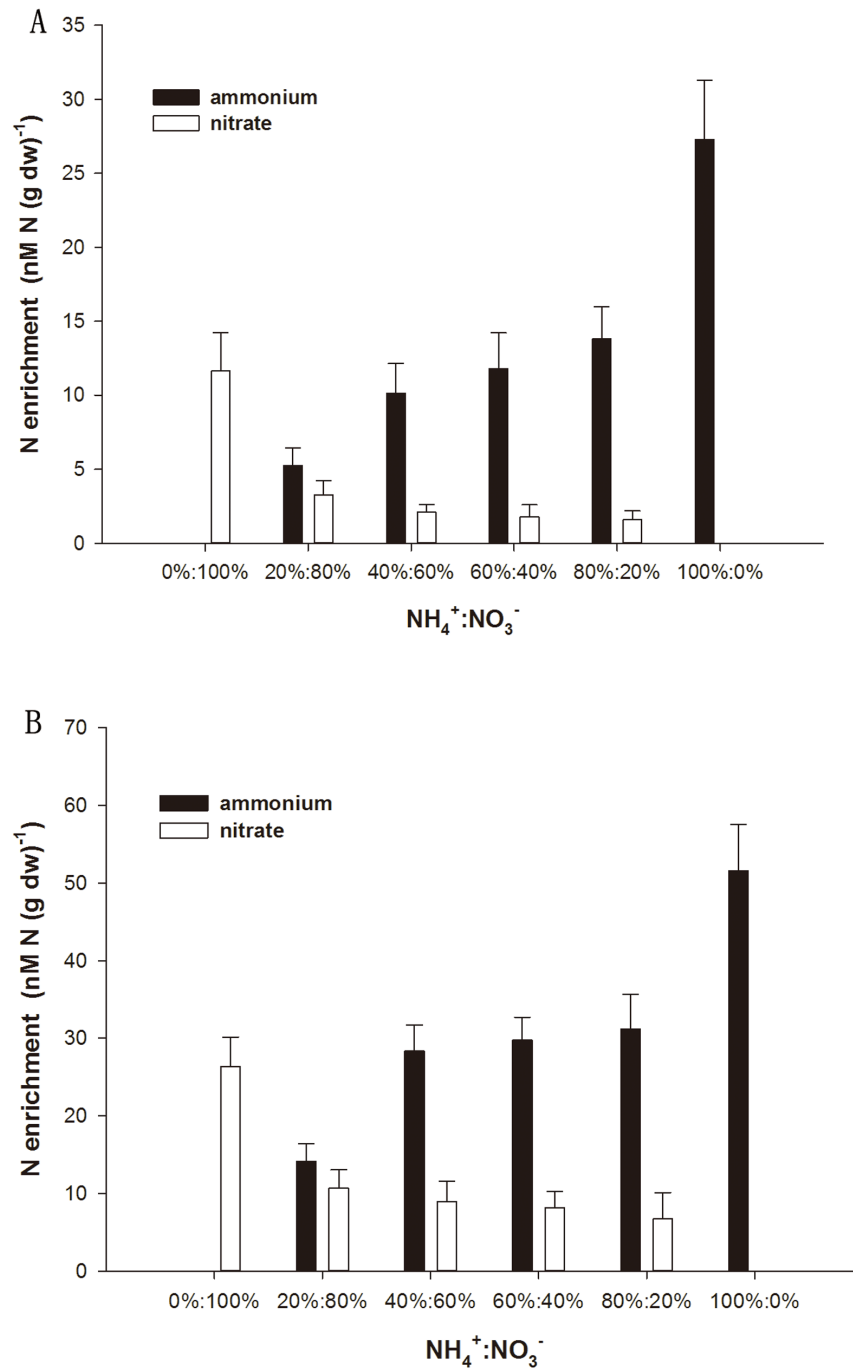

**Figure 5. Ammonium (NH<sub>4</sub><sup>+</sup>) and nitrate (NO<sub>3</sub><sup>-</sup>) enrichment by *G. tenuistipitata* at different time intervals.** A) 1 h and B) 24 h. The culture media contained 50 μM total N, but different proportions of NH<sub>4</sub><sup>+</sup>: NO<sub>3</sub><sup>-</sup>. Phosphate (10 μM) was added in all treatments. doi:10.1371/journal.pone.0108980.g005

Rhodophyta species in the marine or estuarine environment [19,20,21,22,48,49,55,56]. Commonly, Chlorophyta follow Michaelis-Menten kinetics for NH<sub>4</sub><sup>+</sup> and NO<sub>3</sub><sup>-</sup> [20,21,56], Rhodophyta differ depending on the species [19,22,48]. Higher  $V_{max}$  were found in Chlorophyta for NO<sub>3</sub><sup>-</sup> [20,21]. *G. tenuistipitata* has the relatively higher  $V_{max}$  in Rhodophyta species, implying higher assimilating and storing capability for NO<sub>3</sub><sup>-</sup>. However, the  $V_{max}/K_s$  value was 0.6, less than 1, indicating the competitive advantage for NO<sub>3</sub><sup>-</sup> is not so obvious compared with other Rhodophyta species. During the bloom, NO<sub>3</sub><sup>-</sup> concentration was relatively

low, while NH<sub>4</sub><sup>+</sup> was abundant. What's more, resilience to low salinities might be a principal reason for bloom of *G. tenuistipitata*.

Environmental factors, including temperature, salinity, nutrient levels and other relevant competitors, are principally responsible for regulating macroalgal bloom occurrence [6,7]. Because Shenzhen Bay is in the subtropical zone, the water temperature is relatively constant between day and night, without great changes between different months, so our research did not focus on its influence on algal RGR, with attention to the effect of salinity and DIN. Besides, the competition for resources (especially nutrients) is

**Table 2.** Comparison of  $V_{max}$  ( $\mu\text{M g}^{-1} \text{DM h}^{-1}$ ),  $K_s$  ( $\mu\text{M}$ ) values and substrate range ( $\mu\text{M}$ ) for several Chlorophyta and Rhodophyta species in the marine or estuarine environment.

| Species                           | $\text{NH}_4^+$ |       |          | $\text{NO}_3^-$ |       |          | Reference     |
|-----------------------------------|-----------------|-------|----------|-----------------|-------|----------|---------------|
|                                   | $V_{max}$       | $K_s$ | S. range | $V_{max}$       | $K_s$ | S. range |               |
| <i>Chloro-phyta</i>               |                 |       |          |                 |       |          |               |
| <i>Ulva lactuca</i>               | 450             | 85    | ~1200    | 116             | 34    | ~50      | [20]          |
| <i>Ulva prolifera</i>             | 284.6           | 25.1  | ~250     | 124.3           | 15.1  | ~250     | [21]          |
| <i>Ulva linza</i>                 | 250.2           | 37    | ~250     | 109.1           | 23    | ~250     | [21]          |
| <i>Cladophora montagneana</i>     | 130             | 20.7  | ~357     | 42.1            | 1.4   | ~357     | [56]          |
| <i>Rhodo-phyta</i>                |                 |       |          |                 |       |          |               |
| <i>Gracilaria foliifera</i>       | 23.8            | 1.6   | ~15      | 9.7             | 2.5   | ~15      | [55]          |
| <i>Gracilaria pacifica</i>        | 21.5            | 50.9  | ~15      | 6.0             | 26.8  | ~30      | [19]          |
| <i>Gracilaria gracilis</i>        | —               | —     | ~40      | 35              | 5.6   | ~50      | [48]          |
| <i>Gracilaria vermiculophylla</i> | —               | —     | ~160     | +               | +     | ~400     | [22]          |
| <i>Catenella nipae</i>            | 550             | 692   | ~1200    | 8.3             | 5     | ~50      | [20]          |
| <i>Gracilaria tenuistipitata</i>  | —               | —     | ~500     | *               | *     |          | [49]          |
| <i>Gracilaria tenuistipitata</i>  | —               | —     | ~100     | 37.2            | 61.5  | ~100     | Present study |

— means linear, rate-unsaturated response.

\* means not clear.

\* means no report.

doi:10.1371/journal.pone.0108980.t002



ubiquitous in marine phytoplankton [55], and the chemical defense system is another important potential mechanism for algal competition. Allelopathy, one type of chemical defense competition between plants, can be a potent influential factor. Xu et al. [57] found allelopathic interactions happened between green tide-forming species *Ulva prolifera* and macroalga *Gracilaria lichvoides*, indicating that some allelochemicals released by both of the macroalgae could account for the physiological inhibition of growth. In our study, there is only one species, namely *G. tenuistipitata*, lived and bloomed in the OCT North Lake until 2014, no other macroalga was found. So we neglect the competing role among macroalgae.

From our  $^{15}\text{N}$  tracer study, we found the opportunistic macroalga *G. tenuistipitata* actively utilizes multiple DIN species simultaneously, and prefers the most energetically efficient ( $\text{NH}_4^+$ ) when available. Other previous reports have also found  $\text{NH}_4^+$  uptake preference. D'Elia and DeBoer found the priority of  $\text{NH}_4^+$  uptake, even in very low concentrations ( $\sim 5 \mu\text{M}$ ), and its presence seriously decreased the uptake of  $\text{NO}_3^-$  by *Gracilaria foliifera* (Forsskal) *Borgesen* [58], while Hanisak and Harlin determined that only  $1 \mu\text{M}$   $\text{NH}_4^+$  was enough to decrease  $\text{NO}_3^-$  uptake in *Codium fragile* (van Goor) *Silva* [59]. Haines and Wheeler showed that  $\text{NO}_3^-$  uptake by *Hypnea musciformis* (Wulfen) *Lamouroux* was reduced by 50% in the presence of about  $18 \mu\text{M}$   $\text{NH}_4^+$  [60]. Our study also found a decrease of  $\text{NO}_3^-$  uptake when  $\text{NH}_4^+$  was present. The result suggested that when  $\text{NH}_4^+$

and  $\text{NO}_3^-$  were supplied in equal or less ratio concentrations simultaneously, more  $\text{NH}_4^+$  was taken up and assimilated.

From the present study, three key conclusions were obtained: *i*) the growth of *G. tenuistipitata* was regulated by salinity and N availability in environment. Its tolerance of relatively low salinity in estuarine environment seems to be a principal factor for its bloom rather than the other species. Its high growth rate and extraordinary capabilities for utilizing nutrients, like DIN likely contribute to macroalgal outbreaks; *ii*) The DIN:  $\text{NH}_4^+$  and  $\text{NO}_3^-$  uptake kinetics of *G. tenuistipitata* are different.  $\text{NH}_4^+$  uptake demonstrated a rate-unsaturated response, but  $\text{NO}_3^-$  uptake followed a rate-saturating mechanism which fit the Michaelis-Menten model, with kinetic parameters  $V_{max}$  ( $37.2 \mu\text{M g}^{-1} \text{DM h}^{-1}$ ) and  $K_s$  ( $61.5 \mu\text{M}$ ), indicating a higher uptake efficiency of  $\text{NH}_4^+$  than  $\text{NO}_3^-$ ; *iii*) The strategy of *G. tenuistipitata* assimilating different forms of DIN showed that  $\text{NH}_4^+$  incorporated faster than  $\text{NO}_3^-$ . We propose that when  $\text{NH}_4^+$  and  $\text{NO}_3^-$  were supplied simultaneously, *G. tenuistipitata* preferentially assimilated  $\text{NH}_4^+$ . One mechanism that may enhance bloom ability is the strategy to choose and use different DIN in estuarine environments.

## Author Contributions

Conceived and designed the experiments: CW AL KZ ZH. Performed the experiments: CW WH JY. Analyzed the data: CW AL. Contributed reagents/materials/analysis tools: CW AL WH JY. Wrote the paper: CW.

## References

1. ECOHAB (1995) The Ecology and Oceanography of Harmful Algae Blooms. WHOI, Woods Hole, MA: A National Research Agenda.
2. Fletcher RL (1996) The occurrence of "green tides": a review. In: Schramm W PHNPHE, editor. Marine benthic vegetation Recent changes and the effects of eutrophication. Berlin, Germany: Springer. pp. 7–43.
3. Valiela I, McClelland J, Hauxwell J, Behr PJ, Hersh D, et al. (1997) Macroalgal blooms in shallow estuaries: Controls and ecophysiological and ecosystem consequences. *Limnology and Oceanography* 42: 1105–1118.
4. Wang C, Yu RC, Zhou MJ (2011) Acute toxicity of live and decomposing green alga *Ulva prolifera* to abalone *Haliotis discus hannai*. *Chinese Journal of Oceanology and Limnology* 29: 541–546.
5. Wang C, Yu RC, Zhou MJ (2012) Effects of the decomposing green macroalga *Ulva prolifera* on the growth of four red-tide species. *Harmful Algae* 16: 12–19.
6. Hernandez I, Peralta G, PerezLlorens JL, Vergara JJ, Niell FX (1997) Biomass and dynamics of growth of *Ulva* species in Palmones river estuary. *Journal of Phycology* 33: 764–772.
7. McGlathery KJ (2001) Macroalgal blooms contribute to the decline of seagrass in nutrient-enriched coastal waters. *Journal of Phycology* 37: 453–456.
8. Nelson TA, Lee A (2001) A manipulative experiment demonstrates that blooms of the macroalga *Ulvaria obscura* can reduce eelgrass shoot density. *Aquatic Botany* 71: 149–154.
9. Franz DR, Friedman I (2002) Effects of a macroalgal mat (*Ulva lactuca*) on estuarine sand flat copepods: an experimental study. *Journal of Experimental Marine Biology and Ecology* 271: 209–226.
10. Kirst GO (1995) Influence of salinity on algal ecosystems. In: Eds. W. Wiessner ESaCS, editor. In 'Algae, Environment and Human Affairs. England: Biopress: Bristol. pp. 123–142.
11. Cloern JE (1987) Turbidity as a control on phytoplankton biomass and productivity in estuaries. *Continental Shelf Research* 7: 1367–1381.
12. Chan TU, Hamilton P (2001) Effect of freshwater flow on the succession and biomass of phytoplankton in a seasonal estuary. *Marine and Freshwater Research* 52: 869–884.
13. Liu G, Lai LW (2013) the Shenzhen bay is sick. *Jing newspaper*. Available: [http://jb.sznews.com/html/2013-10/20/content\\_2655847.htm](http://jb.sznews.com/html/2013-10/20/content_2655847.htm)
14. Zhang J, Zhang Y, Zhou K, Zhang J, Li X (2010) Evaluation on temporal and spatial distribution of nutrients and potential eutrophication in Shenzhen Bay. *Ecology and Environmental Sciences*. 19(2): 253–261.
15. Pedersen MF, Borum J (1996) Nutrient control of algal growth in estuarine waters. Nutrient limitation and the importance of nitrogen requirements and nitrogen storage among phytoplankton and species of macroalgae. *Marine Ecology Progress Series* 142: 261–272.
16. Carneiro MAA, Freire FAdM, Marinho-Soriano E (2011) Study on biofiltration capacity and kinetics of nutrient uptake by *Gracilaria cervicornis* (Turner) *J. Agardh* (Rhodophyta, Gracilariaceae). *Revista Brasileira De Farmacognosia-Brazilian Journal of Pharmacognosy* 21: 329–333.
17. Marinho-Soriano E, Panucci RA, Carneiro MAA, Pereira DC (2009) Evaluation of *Gracilaria caudata* *J. Agardh* for bioremediation of nutrients from shrimp farming wastewater. *Bioresource Technology* 100: 6192–6198.
18. Yang YF, Fei XG, Song JM, Hu HY, Wang GC, et al. (2006) Growth of *Gracilaria lemaneiformis* under different cultivation conditions and its effects on nutrient removal in Chinese coastal waters. *Aquaculture* 254: 248–255.
19. Thomas TE, Harrison PJ (1987) Rapid ammonium uptake and nitrogen interactions in 5 intertidal seaweeds grown under field conditions. *Journal of Experimental Marine Biology and Ecology* 107: 1–8.
20. Runcie JW, Ritchie RJ, Larkum AW (2003) Uptake kinetics and assimilation of inorganic nitrogen by *Catenella nipae* and *Ulva lactuca*. *Aquatic Botany* 76: 155–174.
21. Luo MB, Liu F, Xu ZL (2012) Growth and nutrient uptake capacity of two co-occurring species, *Ulva prolifera* and *Ulva linza*. *Aquatic Botany* 100: 18–24.
22. Abreu MH, Pereira R, Buschmann AH, Sousa-Pinto I, Yarish C (2011) Nitrogen uptake responses of *Gracilaria vermiculophylla* (Ohmi) *Papenfuss* under combined and single addition of nitrate and ammonium. *Journal of Experimental Marine Biology and Ecology* 407: 190–199.
23. Smith SL, Yamanaka Y, Pahlow M, Oschlies A (2009) Optimal uptake kinetics: physiological acclimation explains the pattern of nitrate uptake by phytoplankton in the ocean. *Marine Ecology Progress Series* 384: 1–12.
24. Lotze HK, Schramm W (2000) Ecophysiological traits explain species dominance patterns in macroalgal blooms. *Journal of Phycology* 36: 287–295.
25. Naldi M, Wheeler PA (2002) N-15 measurements of ammonium and nitrate uptake by *Ulva fenestrata* (chlorophyta) and *Gracilaria pacifica* (rhodophyta): Comparison of net nutrient disappearance, release of ammonium and nitrate, and N-15 accumulation in algal tissue. *Journal of Phycology* 38: 135–144.
26. Raffaelli D, Balls P, Way S, Patterson IJ, Hohmann S, et al. (1999) Major long-term changes in the ecology of the Ythan estuary, Aberdeenshire, Scotland; how important are physical factors? *Aquatic Conservation-Marine and Freshwater Ecosystems* 9: 219–236.
27. Valiela I, Foreman K, Lamontagne M, Hersh D, Costa J, et al. (1992) Couplings of watersheds and coastal waters-sources and consequences of nutrient enrichment in waquoit bay, Massachusetts. *Estuaries* 15: 443–457.
28. Guillard RRL (1975) Culture of phytoplankton for feeding marine invertebrates. In: Smith WL, Chanley MH, editors. *Culture of Marine Invertebrate Animals*. New York: Plenum Press. pp. 26–60.
29. Bjornstater BR, Wheeler PA (1990) Effect of nitrogen and phosphorus supply on growth and tissue composition of *Ulva fenestrata* and *Enteromorpha-intestinalis* (Ulvales, Chlorophyta). *Journal of Phycology* 26: 603–611.
30. Dowd JE, Riggs DS (1965) A comparison of estimates of michaelis-menten kinetic constants from various linear transformations. *Journal of Biological Chemistry* 240: 863–8.
31. Israel A, Martinez-Goss M, Friedlander M (1999) Effect of salinity and pH on growth and agar yield of *Gracilaria tenuistipitata* var. *liui* in laboratory and outdoor cultivation. *Journal of Applied Phycology* 11: 543–549.

32. He LH, Wu M, Qian PY, Zhu MY (2002) Effects of co-culture and salinity on the growth and agar yield of *Gracilaria tenuistipitata* var *liui* Zhang et Xia. Chinese Journal of Oceanology and Limnology 20: 365–370.
33. Bunsom C, Prathep A (2012) Effects of salinity, light intensity and sediment on growth, pigments, agar production and reproduction in *Gracilaria tenuistipitata* from Songkhla Lagoon in Thailand. Phycological Research 60: 169–178.
34. Ekman P, Yu SK, Pedersen M (1991) Effects of altered salinity, darkness and algal nutrient status on floridoside and starch content, alpha-galactosidase activity and agar yield of cultivated *gracilaria sordida*. British Phycological Journal 26: 123–131.
35. Choi HG, Kim YS, Kim JH, Lee SJ, Park EJ, et al. (2006) Effects of temperature and salinity on the growth of *Gracilaria verrucosa* and *G-chorda*, with the potential for mariculture in Korea. Journal of Applied Phycology 18: 269–277.
36. Kim JK, Kraemer GP, Neefus CD, Chung IK, Yarish C (2007) Effects of temperature and ammonium on growth, pigment production and nitrogen uptake by four species of *Porphyra* (Bangiales, Rhodophyta) native to the New England coast. Journal of Applied Phycology 19: 431–440.
37. Pinchetti JLG, Fernandez ED, Diez PM, Reina GG (1998) Nitrogen availability influences the biochemical composition and photosynthesis of tank-cultivated *Ulva rigida* (Chlorophyta). Journal of Applied Phycology 10: 383–389.
38. Fong P, Donohoe RM, Zedler JB (1994) Nutrient concentration in tissue of the macroalga enteromorpha as a function of nutrient history—an experimental evaluation using field microcosms. Marine Ecology Progress Series 106: 273–281.
39. Waite TD, Mitchell R (1972) Role of benthic plants in fertilized estuary. Journal of the Sanitary Engineering Division-Asce 98: 763–&.
40. McGlathery KJ, Pedersen MF, Borum J (1996) Changes in intracellular nitrogen pools and feedback controls on nitrogen uptake in *Chaetomorpha linum* (chlorophyta). Journal of Phycology 32: 393–401.
41. McClelland JW, Valiela I (1998) Changes in food web structure under the influence of increased anthropogenic nitrogen inputs to estuaries. Marine Ecology Progress Series 168: 259–271.
42. Pedersen MF (1994) Transient ammonium uptake in the macroalga *Ulva-lactuca* (Chlorophyta) - nature, regulation, and the consequences for choice of measuring technique. Journal of Phycology 30: 980–986.
43. Pedersen MF, Borum J (1997) Nutrient control of estuarine macroalgae: growth strategy and the balance between nitrogen requirements and uptake. Marine Ecology Progress Series 161: 155–163.
44. Phillips JC, Hurd CL (2004) Kinetics of nitrate, ammonium, and urea uptake by four intertidal seaweeds from New Zealand. Journal of Phycology 40: 534–545.
45. Touchette BW, Burkholder JM (2000) Review of nitrogen and phosphorus metabolism in seagrasses. Journal of Experimental Marine Biology and Ecology 250: 133–167.
46. Wen SS, Zhang HY, He WH, Zhang QJ, Xu SN, et al. (2008) Study on NH<sub>4</sub>-N removing efficiency and kinetics in *Gracilaria asiatica*. Journal of Fisheries of China 32(5): 754–803.
47. Delia CF, Deboer JA (1978) Nutritional studies of 2 red algae.2. kinetics of ammonium and nitrate uptake. Journal of Phycology 14: 266–272.
48. Smit AJ (2002) Nitrogen uptake by *Gracilaria gracilis* (Rhodophyta): Adaptations to a temporally variable nitrogen environment. Botanica Marina 45: 196–209.
49. Li J, Huang L, Guo F, Cai A, Zheng Y (2007) Absorption of N, P Nutrients by *Gracilaria tenuistipitata* and its resistant effect on the outbreak of red tide. Journal of Xiamen U niversity (Natural Science) 46(2): 221–225.
50. Randall DJ, Tsui TKN (2002) Ammonia toxicity in fish. Marine Pollution Bulletin 45: 17–23.
51. Harrison PJ, Hurd CL (2001) Nutrient physiology of seaweeds: Application of concepts to aquaculture. Cahiers De Biologie Marine 42: 71–82.
52. Neori A, Chopin T, Troell M, Buschmann AH, Kraemer GP, et al. (2004) Integrated aquaculture: rationale, evolution and state of the art emphasizing seaweed biofiltration in modern mariculture. Aquaculture 231: 361–391.
53. Rosenberg G, Ramus J (1984) Uptake of inorganic nitrogen and seaweed surface-area-volume ratios. Aquatic Botany 19: 65–72.
54. Hurd CL, Berges JA, Osborne J, Harrison PJ (1995) An in-vitro nitrate reductase assay for marine macroalgae - optimization and characterization of the enzyme for *fucus-gardneri* (Phaeophyta). Journal of Phycology 31: 835–843.
55. Zhou MJ, Zhu MY (2006) Progress of the Project “Ecology and Oceanography of Harmful Algal Blooms in China”. Advances in Earth Science 7: 673–679.
56. Gordon DM, Birch PB, McComb AJ (1981) Effects of inorganic phosphorus and nitrogen on the growth of estuarine *cladophora* in culture. Botanica Marina 24: 93–106.
57. Xu D, Gao ZQ, Zhang XW, Fan X, Wang YT (2012) Allelopathic Interactions between the Opportunistic Species *Ulva prolifera* and the Native Macroalga *Gracilaria lemaneiformis*. Plos one 10.1371/journal.pone.0033648.
58. Delia CF, Deboer JA (1978) Nutritional studies of 2 red algae.2. kinetics of ammonium and nitrate uptake. Journal of Phycology 14: 266–272.
59. Hanisak MD, Harlin MM (1978) Uptake of inorganic nitrogen by *codium-fragile* subsp *tomentosoides* (Chlorophyta). Journal of Phycology 14: 450–454.
60. Haines KC, Wheeler PA (1978) Ammonium and nitrate uptake by marine macrophytes *hypnea-musciformis* (Rhodophyta) and *macrocytis-pyrifer* (Phaeophyta). Journal of Phycology 14: 319–324.
